# Supplementary material for: Two chiral CoIII and NiII complexes with identical ligands presenting different nonlinear optical responses
Source: Royal Society of Chemistry journal article supplement (doi:10.1039/d4nj01544d), 2024-01-01
Supplement: d4nj01544d1.pdf [file d4nj01544d1.pdf]

## Supporting information for

### Two chiral $\text{Co}^{\text{III}}$ and $\text{Ni}^{\text{II}}$ complexes with the identical ligands presenting different nonlinear optical responses

Taoyu Wang,<sup>a,b</sup> Yanhong Peng,<sup>\*a,b</sup> Zhiqiang Zhang,<sup>c</sup> Congli Gao<sup>c</sup> and Xi-Li Li<sup>\*c</sup>

<sup>a</sup>Guangdong Provincial Laboratory of Chemistry and Fine Chemical Engineering  
Jieyang Center, Jieyang 515200, China

<sup>b</sup>School of Advanced Manufacturing, Guangdong University of Technology, Jieyang  
515200, China. E-mail: pengyh@gdut.edu.cn

<sup>c</sup>Henan Provincial Key Laboratory of Surface and Interface Science, Zhengzhou  
University of Light Industry, Zhengzhou 450002, PR China. E-mail:  
lixl@zzuli.edu.cn

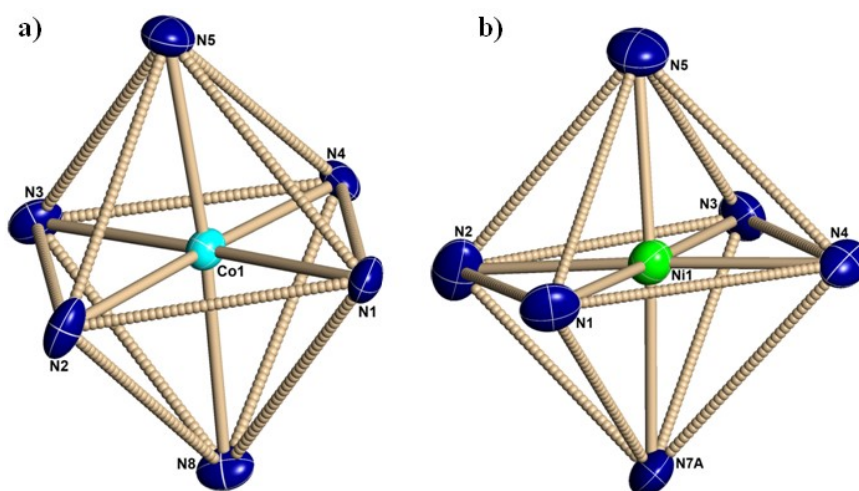

Fig. S1 Coordination geometries of Co1 in **1** (a) and Ni1 in **2** (b).

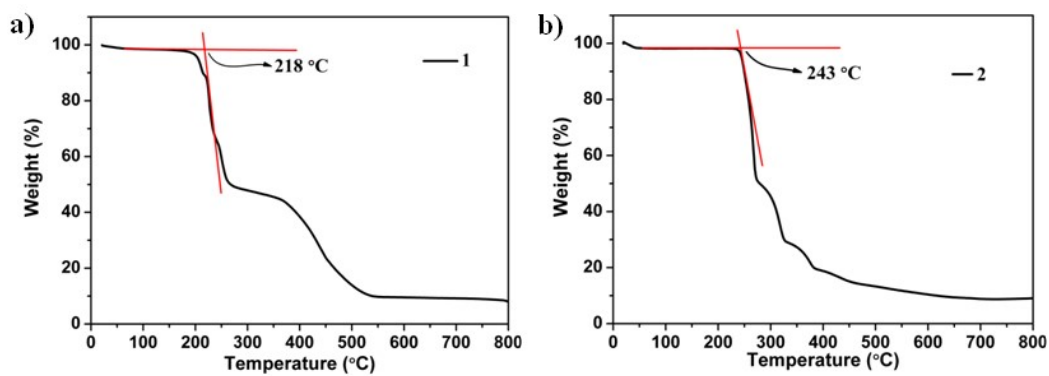

**Fig. S2** Thermogravimetric analyses of **1** (a) and **2** (b).

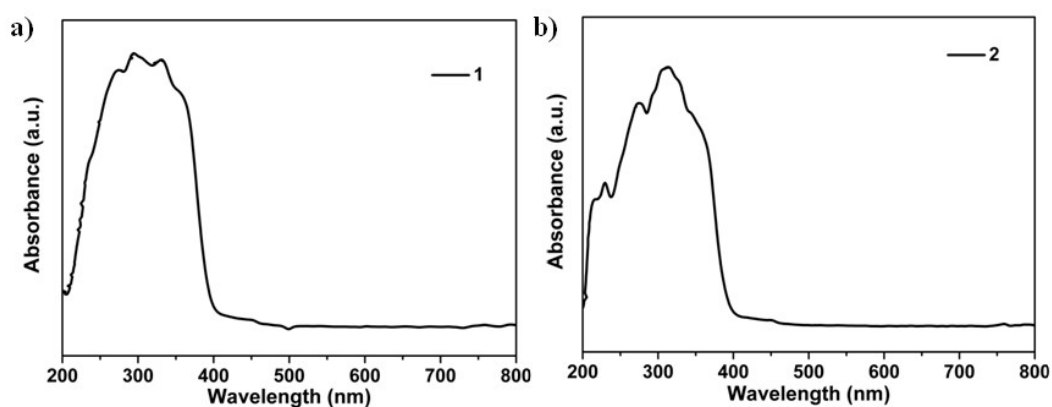

**Fig. S3.** UV-vis diffuse reflectance spectra of **1** (a) and **2** (b).

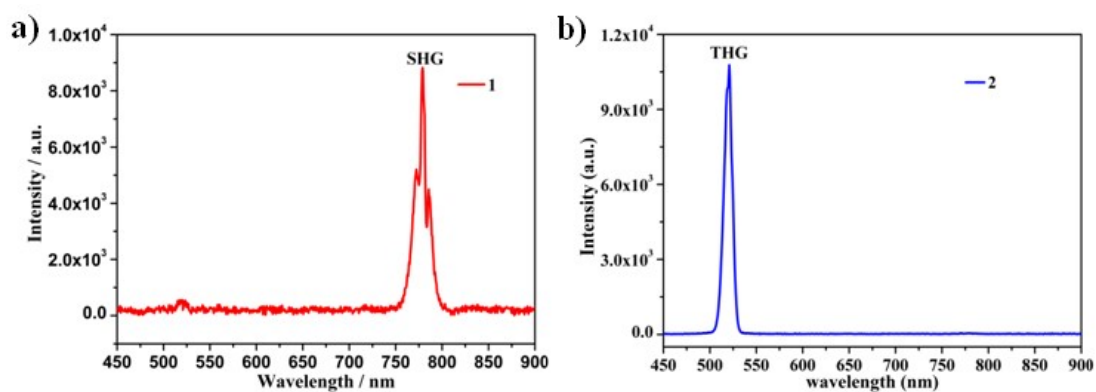

**Fig. S4** (a) SHG spectrum of **1**. (b) THG spectrum of **2**. Under the excitation at  $\lambda = 1550$  nm ( $T_{\text{int}} = 0.5$  s) at room temperature.

**Table S1** Crystallographic data and structure refinement parameters for **1** and **2**.

| Complexes                                                  | <b>1</b>                                                              | <b>2</b>                                                             |
|------------------------------------------------------------|-----------------------------------------------------------------------|----------------------------------------------------------------------|
| Chemical formula                                           | C <sub>28</sub> H <sub>33</sub> N <sub>10</sub> O <sub>4.5</sub> ClCo | C <sub>28</sub> H <sub>33</sub> N <sub>7</sub> O <sub>4.5</sub> ClNi |
| Formula weight                                             | 676.02                                                                | 633.75                                                               |
| Crystal system                                             | triclinic                                                             | monoclinic                                                           |
| Space group                                                | <i>P1</i>                                                             | <i>Cc</i>                                                            |
| <i>a</i> (Å)                                               | 7.2172(16)                                                            | 31.575(2)                                                            |
| <i>b</i> (Å)                                               | 9.066(2)                                                              | 6.0167(12)                                                           |
| <i>c</i> (Å)                                               | 13.516(3)                                                             | 17.2771(15)                                                          |
| $\alpha$ (deg)                                             | 89.015(3)                                                             | 90                                                                   |
| $\beta$ (deg)                                              | 78.749(4)                                                             | 116.709(3)                                                           |
| $\gamma$ (deg)                                             | 73.930(3)                                                             | 90                                                                   |
| <i>V</i> (Å <sup>3</sup> )                                 | 832.8(3)                                                              | 2932.1(7)                                                            |
| <i>Z</i>                                                   | 1                                                                     | 2                                                                    |
| <i>D<sub>c</sub></i> (g cm <sup>-3</sup> )                 | 1.348                                                                 | 1.436                                                                |
| $\mu$ (mm <sup>-1</sup> )                                  | 0.645                                                                 | 0.801                                                                |
| F(000)                                                     | 351                                                                   | 1324                                                                 |
| Reflections collected                                      | 4211                                                                  | 7520                                                                 |
| Independent reflections                                    | 3533                                                                  | 4010                                                                 |
| Data/restraints/parameters                                 | 3533/3/406                                                            | 4010/3/379                                                           |
| GOF                                                        | 1.006                                                                 | 1.079                                                                |
| $R_1$ [ <i>I</i> >= 2 $\sigma$ ( <i>I</i> )] <sup>a</sup>  | 0.0567                                                                | 0.0468                                                               |
| $wR_2$ [ <i>I</i> >= 2 $\sigma$ ( <i>I</i> )] <sup>b</sup> | 0.1203                                                                | 0.1165                                                               |
| Flack parameter                                            | 0.03(2)                                                               | 0.015(13)                                                            |
| CCDC                                                       | 2342450                                                               | 2342453                                                              |

$$^a R_1 = \sum ||F_o| - |F_c|| / \sum |F_o|, \quad ^b wR_2 = [\sum w(F_o^2 - F_c^2)^2 / \sum w(F_o^2)^2]^{1/2}$$

**Table S2** Selected bond lengths (Å) and angles (°) for **1** and **2**.

| Bond lengths for <b>1</b>          |          |                  |          |                 |          |
|------------------------------------|----------|------------------|----------|-----------------|----------|
| Co(1)—N(1)                         | 1.930(8) | Co(1)—N(2)       | 1.959(7) | Co(1)—N(3)      | 1.964(8) |
| Co(1)—N(4)                         | 1.925(6) | Co(1)—N(5)       | 1.944(8) | Co(1)—N(8)      | 1.959(7) |
| Bond lengths for <b>2</b>          |          |                  |          |                 |          |
| Ni(1)—N(1)                         | 2.118(5) | Ni(1)—N(2)       | 2.067(6) | Ni(1)—N(3)      | 2.071(5) |
| Ni(1)—N(4)                         | 2.176(6) | Ni(1)—N(5)       | 2.172(6) | Ni(1)—N(7A)     | 2.183(5) |
| Symmetry code for A: $x, y + 1, z$ |          |                  |          |                 |          |
| Bond angles for <b>1</b>           |          |                  |          |                 |          |
| N(1)-Co(1)-N(2)                    | 85.6(3)  | N(3)-Co(1)-N(4)  | 87.0(3)  | N(1)-Co(1)-N(4) | 96.1(3)  |
| N(3)-Co(1)-N(2)                    | 91.3(3)  | N(5)-Co(1)-N(8)  | 175.3(4) |                 |          |
| Bond angles for <b>2</b>           |          |                  |          |                 |          |
| N(1)-Ni(1)-N(2)                    | 78.5(2)  | N(3)-Ni(1)-N(4)  | 82.3(2)  | N(1)-Ni(1)-N(4) | 101.4(2) |
| N(3)-Ni(1)-N(2)                    | 94.8(2)  | N(5)-Ni(1)-N(7A) | 173.7(2) |                 |          |
| Symmetry code for A: $x, y + 1, z$ |          |                  |          |                 |          |

**Table S3** Calculated dipole moments of **1** and **2**.

| Complex                  | <b>1</b> | <b>2</b> |
|--------------------------|----------|----------|
| $\mu_{\text{total}}$ (D) | 16.1663  | 26.8221  |
| $x$                      | 0.5789   | -8.2162  |
| $y$                      | -16.0616 | -23.5702 |
| $z$                      | 1.7440   | -9.8167  |

**Table S4** The coordinates of the calculated structure for **1**.

|   | <i>x</i> | <i>y</i> | <i>z</i> |
|---|----------|----------|----------|
| C | 3.9910   | 6.3730   | -2.3380  |
| C | 2.7570   | 6.3710   | -3.0020  |
| H | 1.9910   | 6.6580   | -2.5600  |
| C | 2.6800   | 5.9350   | -4.3250  |
| H | 1.8620   | 5.9140   | -4.7660  |
| C | 3.8400   | 5.5340   | -4.9780  |
| H | 3.8030   | 5.2640   | -5.8680  |
| C | 5.0530   | 5.5350   | -4.3010  |
| H | 5.8230   | 5.2530   | -4.7410  |
| C | 5.1340   | 5.9390   | -3.0250  |
| H | 5.9560   | 5.9300   | -2.5920  |
| C | 4.0830   | 9.3070   | -1.3910  |
| C | 3.2880   | 10.1710  | -2.1340  |
| H | 2.3750   | 10.0100  | -2.2110  |
| C | 3.8520   | 11.2720  | -2.7600  |
| H | 3.3230   | 11.8450  | -3.2680  |
| C | 5.1750   | 11.5080  | -2.6310  |
| H | 5.5420   | 12.2580  | -3.0410  |
| C | 6.0140   | 10.6550  | -1.8940  |
| H | 6.9270   | 10.8190  | -1.8350  |
| C | 5.4480   | 9.5690   | -1.2620  |
| H | 5.9790   | 9.0070   | -0.7460  |
| C | 2.3430   | 7.2930   | 5.8100   |
| C | 3.0940   | 7.5200   | 6.9380   |
| H | 4.0000   | 7.3080   | 6.9260   |
| C | 2.5480   | 8.0490   | 8.0880   |
| H | 3.0750   | 8.1880   | 8.8420   |

|    |         |        |         |
|----|---------|--------|---------|
| C  | 1.2130  | 8.3660 | 8.0990  |
| H  | 0.8400  | 8.7330 | 8.8670  |
| C  | 0.4020  | 8.1500 | 6.9780  |
| H  | -0.5040 | 8.3610 | 6.9940  |
| C  | 0.9920  | 7.6080 | 5.8390  |
| H  | 0.4710  | 7.4550 | 5.0840  |
| C  | 2.3810  | 4.3110 | 5.0790  |
| C  | 3.5450  | 3.9110 | 5.6870  |
| H  | 4.3340  | 4.3650 | 5.4970  |
| C  | 3.5760  | 2.8530 | 6.5710  |
| H  | 4.3720  | 2.6060 | 6.9860  |
| C  | 2.3790  | 2.1550 | 6.8360  |
| H  | 2.3890  | 1.4350 | 7.4240  |
| C  | 1.1810  | 2.5300 | 6.2270  |
| H  | 0.3900  | 2.0770 | 6.4120  |
| C  | 1.1980  | 3.5970 | 5.3400  |
| H  | 0.4120  | 3.8430 | 4.9080  |
| C  | 4.1170  | 6.8270 | -0.9100 |
| H  | 5.0690  | 6.9270 | -0.7010 |
| C  | 3.4180  | 8.1790 | -0.6480 |
| H  | 2.4680  | 8.1260 | -0.8800 |
| C  | 2.9560  | 6.6860 | 4.6240  |
| H  | 3.8870  | 6.4790 | 4.8520  |
| C  | 2.3290  | 5.4070 | 4.0710  |
| H  | 1.3850  | 5.5950 | 3.8850  |
| Cl | 5.3150  | 2.1130 | 1.6110  |
| Co | 3.2460  | 6.7340 | 1.7730  |
| N  | 3.5230  | 5.8810 | 0.0640  |
| H  | 4.0640  | 5.1820 | 0.1660  |

|   |        |        |         |
|---|--------|--------|---------|
| H | 2.7440 | 5.5840 | -0.2490 |
| N | 3.5910 | 8.4120 | 0.8230  |
| H | 3.0230 | 9.0390 | 1.0980  |
| H | 4.4190 | 8.6900 | 0.9890  |
| N | 2.9830 | 7.6950 | 3.4670  |
| H | 3.6440 | 8.2770 | 3.5880  |
| H | 2.2160 | 8.1450 | 3.4410  |
| N | 2.9920 | 5.1090 | 2.7740  |
| H | 2.4910 | 4.5440 | 2.3040  |
| H | 3.7800 | 4.7230 | 2.9220  |
| N | 1.3240 | 6.8980 | 1.5250  |
| N | 0.7920 | 6.6940 | 0.5050  |
| N | 0.2900 | 6.5760 | -0.4540 |
| N | 5.1910 | 6.7280 | 2.0050  |
| N | 5.6470 | 6.1530 | 2.9140  |
| N | 6.1890 | 5.6650 | 3.8070  |
| O | 3.9320 | 1.7280 | 1.7500  |
| O | 6.0490 | 1.7410 | 2.7860  |
| O | 5.8870 | 1.4850 | 0.4440  |
| O | 5.3680 | 3.5320 | 1.4760  |
| O | 8.4610 | 3.6030 | 0.6290  |
| H | 7.7230 | 3.2500 | 0.8600  |
| H | 8.4250 | 4.4430 | 0.7540  |

**Table S5** The coordinates of the calculated structure for **2**.

|   | <i>x</i> | <i>y</i> | <i>z</i> |
|---|----------|----------|----------|
| C | 10.3030  | 2.7330   | 1.7890   |
| C | 10.0410  | 3.7570   | 0.9660   |
| H | 10.0860  | 4.6320   | 1.2780   |
| C | 9.7080   | 3.5070   | -0.3360  |
| H | 9.5680   | 4.2240   | -0.9120  |
| C | 9.5670   | 2.2060   | -0.8290  |
| H | 9.3170   | 2.0550   | -1.7120  |
| C | 9.8140   | 1.1590   | 0.0170   |
| H | 9.7470   | 0.2850   | -0.2950  |
| C | 10.1610  | 1.4020   | 1.3550   |
| H | 10.2980  | 0.6950   | 1.9430   |
| C | 8.4820   | 2.3300   | 4.0580   |
| C | 7.4530   | 3.2420   | 4.1020   |
| H | 7.6290   | 4.1310   | 4.3110   |
| C | 6.1430   | 2.8390   | 3.8370   |
| H | 5.4540   | 3.4580   | 3.8950   |
| C | 5.8550   | 1.5110   | 3.4800   |
| H | 4.9850   | 1.2450   | 3.2830   |
| C | 6.8760   | 0.6380   | 3.4360   |
| H | 6.6950   | -0.2450  | 3.2100   |
| C | 8.1910   | 0.9950   | 3.7090   |
| H | 8.8710   | 0.3620   | 3.6610   |
| C | 13.7980  | 3.6540   | 9.4520   |
| C | 13.8000  | 2.3580   | 10.0440  |
| H | 13.5530  | 1.6190   | 9.5360   |
| C | 14.1470  | 2.1970   | 11.3050  |
| H | 14.1540  | 1.3380   | 11.6620  |



|    |         |        |         |
|----|---------|--------|---------|
| C  | 14.4930 | 3.2490 | 12.1110 |
| H  | 14.7540 | 3.1030 | 12.9920 |
| C  | 14.4540 | 4.5320 | 11.5940 |
| H  | 14.6460 | 5.2600 | 12.1400 |
| C  | 14.1260 | 4.7310 | 10.2740 |
| H  | 14.1210 | 5.5940 | 9.9270  |
| C  | 16.0980 | 3.8250 | 7.3790  |
| C  | 16.5400 | 2.6350 | 7.9870  |
| H  | 15.9220 | 1.9600 | 8.1550  |
| C  | 17.8380 | 2.4420 | 8.3370  |
| H  | 18.1060 | 1.6670 | 8.7770  |
| C  | 18.7380 | 3.4230 | 8.0240  |
| H  | 19.6280 | 3.3030 | 8.2630  |
| C  | 18.3830 | 4.5720 | 7.3740  |
| H  | 19.0250 | 5.2060 | 7.1460  |
| C  | 17.0540 | 4.7680 | 7.0660  |
| H  | 16.7960 | 5.5520 | 6.6360  |
| C  | 10.7420 | 2.9930 | 3.1890  |
| H  | 10.9120 | 3.9570 | 3.2130  |
| C  | 9.8930  | 2.7450 | 4.3720  |
| H  | 9.7580  | 3.6530 | 4.7170  |
| C  | 13.5000 | 3.8450 | 7.9980  |
| H  | 13.1470 | 4.7600 | 8.0210  |
| C  | 14.6930 | 4.0470 | 7.0150  |
| H  | 14.6720 | 5.0170 | 6.8740  |
| Cl | 10.5020 | 0.2410 | 9.9040  |
| N  | 12.0600 | 2.3710 | 3.5400  |
| H  | 12.7220 | 2.6940 | 3.0420  |
| H  | 12.0390 | 1.4840 | 3.4710  |

|    |         |         |         |
|----|---------|---------|---------|
| N  | 10.3700 | 2.0490  | 5.5530  |
| H  | 10.4390 | 1.1700  | 5.4340  |
| H  | 9.8840  | 2.2260  | 6.2800  |
| N  | 12.3210 | 3.1460  | 7.6180  |
| H  | 11.6070 | 3.5730  | 7.9310  |
| H  | 12.3320 | 2.3290  | 7.9730  |
| N  | 14.3040 | 3.5430  | 5.6900  |
| H  | 14.7980 | 2.8270  | 5.4990  |
| H  | 14.4850 | 4.1660  | 5.0810  |
| N  | 12.8880 | 0.9700  | 5.8740  |
| N  | 12.3430 | -0.0240 | 5.5920  |
| N  | 11.7110 | -0.8940 | 5.3460  |
| Ni | 12.2010 | 3.0060  | 5.5560  |
| O  | 9.8420  | -0.9980 | 10.2430 |
| O  | 11.2710 | 0.0320  | 8.6950  |
| O  | 11.4050 | 0.6060  | 10.9900 |
| O  | 9.5240  | 1.2730  | 9.6680  |
| O  | 9.6460  | 3.8720  | 7.7200  |
| H  | 9.7010  | 3.5970  | 6.9190  |
| H  | 10.4080 | 4.1300  | 7.9870  |
